# Supplementary material for: Exploring In Vitro Biological Cellular Responses of Pegylated β-Cyclodextrins
Source: MDPI journal article supplement (doi:10.3390/molecules27093026), 2022-05-08
Supplement: s1 [file s1]

## Exploring *in vitro* biological cellular responses of Pegylated $\beta$ -cyclodextrins

Juliana Rincón-López<sup>1</sup>, Miguelina Martínez-Aguilera<sup>1</sup>, Patricia Guadarrama<sup>1</sup>, Karla Juárez-Moreno<sup>2,\*</sup>, Yareli Rojas-Aguirre<sup>1,\*</sup>

<sup>1</sup> Laboratorio de Materiales Supramoleculares (SupraMatLab), Instituto de Investigaciones en Materiales, Universidad Nacional Autónoma de México, Circuito Exterior S/N, Ciudad Universitaria, 04510, Mexico City

<sup>2</sup> Centro de Física Aplicada y Tecnología Avanzada, Universidad Nacional Autónoma de México, (CFATA-UNAM), Blvd. Juriquilla #3001 Col. Jurica La Mesa CP 76230, Querétaro, Qto., Mexico

\*Correspondence: [yareli.rojas@materiales.unam.mx](mailto:yareli.rojas@materiales.unam.mx) (Y.R-A), [kjuarez@fata.unam.mx](mailto:kjuarez@fata.unam.mx) (K. J-M)

**Table S1.** Effect of  $\beta$ CDPEGs,  $\beta$ CD, and PEGs on the cell cycle of MC3T3-E1 osteoblasts. Results are presented as mean values  $\pm$  SD of triplicate experiments.

| Compound                        | Parameter  | Relative cell population (%) |                 |                 |                 |                 |                 |
|---------------------------------|------------|------------------------------|-----------------|-----------------|-----------------|-----------------|-----------------|
|                                 |            | control                      | 25 $\mu$ g/mL   | 50 $\mu$ g/mL   | 100 $\mu$ g/mL  | 250 $\mu$ g/mL  | 500 $\mu$ g/mL  |
| <i><math>\beta</math>CDPEG2</i> | Sub G0/G1  | 3.7 $\pm$ 0.1                | 3.7 $\pm$ 0.4   | 3.7 $\pm$ 0.2   | 3.8 $\pm$ 0.4   | 3.4 $\pm$ 0.3   | 3.8 $\pm$ 0.3   |
|                                 | G0/G1      | 47.4 $\pm$ 2.1               | 47.1 $\pm$ 2.3  | 44.9 $\pm$ 4.2  | 47.4 $\pm$ 2.2  | 47.1 $\pm$ 2.6  | 43.8 $\pm$ 2.2  |
|                                 | S          | 18.4 $\pm$ 0.6               | 16.5 $\pm$ 4.0  | 15.5 $\pm$ 3.8  | 15.9 $\pm$ 0.8  | 18.0 $\pm$ 5.7  | 23.6 $\pm$ 3.7  |
|                                 | G2/M       | 36.1 $\pm$ 2.3               | 36.4 $\pm$ 1.4  | 34.0 $\pm$ 3.5  | 37.4 $\pm$ 0.8  | 30.6 $\pm$ 1.6  | 27.9 $\pm$ 1.3  |
|                                 | *Viability | 100.0 $\pm$ 9.1              | 97.3 $\pm$ 3.9  | 100.0 $\pm$ 1.2 | 76.4 $\pm$ 14.2 | 85.7 $\pm$ 4.0  | 77.5 $\pm$ 9.5  |
| <i><math>\beta</math>CDPEG5</i> | Sub G0/G1  | 3.7 $\pm$ 0.1                | 3.6 $\pm$ 1.5   | 4.2 $\pm$ 0.4   | 3.7 $\pm$ 0.7   | 4.2 $\pm$ 1.4   | 4.0 $\pm$ 0.2   |
|                                 | G0/G1      | 47.4 $\pm$ 2.1               | 45.5 $\pm$ 2.9  | 54.7 $\pm$ 4.9  | 56.5 $\pm$ 2.4  | 57.7 $\pm$ 1.8  | 56.4 $\pm$ 1.6  |
|                                 | S          | 18.6 $\pm$ 0.8               | 19.8 $\pm$ 1.9  | 22.5 $\pm$ 1.2  | 28.1 $\pm$ 1.3  | 26.5 $\pm$ 2.8  | 27.0 $\pm$ 2.6  |
|                                 | G2/M       | 36.1 $\pm$ 2.3               | 28.2 $\pm$ 0.8  | 18.6 $\pm$ 0.8  | 17.2 $\pm$ 5.4  | 16.6 $\pm$ 4.0  | 12.0 $\pm$ 1.2  |
|                                 | Viability  | 100.0 $\pm$ 9.1              | 77.4 $\pm$ 14.9 | 59.5 $\pm$ 15.2 | 51.1 $\pm$ 14.4 | 55.3 $\pm$ 14.4 | 53.9 $\pm$ 10.4 |
| <i>PEG2</i>                     | Sub G0/G1  | 3.7 $\pm$ 0.1                | 2.8 $\pm$ .4    | 3.7 $\pm$ 0.3   | 4.1 $\pm$ 0.1   | 3.4 $\pm$ 0.5   | 3.9 $\pm$ 0.2   |
|                                 | G0/G1      | 47.4 $\pm$ 2.1               | 46.4 $\pm$ 3.4  | 5.2 $\pm$ 1.0   | 50.2 $\pm$ 1.5  | 49.7 $\pm$ 3.5  | 47.7 $\pm$ 6.9  |
|                                 | S          | 18.6 $\pm$ 0.8               | 23.5 $\pm$ 3.0  | 25.5 $\pm$ 3.0  | 26.9 $\pm$ 2.4  | 24.0 $\pm$ 3.3  | 24.0 $\pm$ 1.8  |
|                                 | G2/M       | 36.1 $\pm$ 2.3               | 11.6 $\pm$ 0.8  | 13.5 $\pm$ 1.1  | 12.9 $\pm$ 1.1  | 13.1 $\pm$ 1.5  | 12.5 $\pm$ 2.1  |
|                                 | *Viability | 100.0 $\pm$ 9.1              | 68.3 $\pm$ 9.3  | 55.3 $\pm$ 5.1  | 52.8 $\pm$ 5.6  | 49.8 $\pm$ 1.2  | 53.4 $\pm$ 2.5  |
| <i>PEG5</i>                     | Sub G0/G1  | 3.7 $\pm$ 0.1                | 3.9 $\pm$ 0.4   | 3.8 $\pm$ 0.6   | 3.4 $\pm$ 1.2   | 3.9 $\pm$ 0.6   | 4.1 $\pm$ 0.5   |
|                                 | G0/G1      | 47.4 $\pm$ 2.1               | 46.8 $\pm$ 3.4  | 50.5 $\pm$ 1.4  | 54.9 $\pm$ 4.0  | 52.4 $\pm$ 2.7  | 53.7 $\pm$ 3.2  |
|                                 | S          | 18.6 $\pm$ 0.8               | 21.1 $\pm$ 0.8  | 23.4 $\pm$ 3.2  | 22.8 $\pm$ 5.3  | 23.3 $\pm$ 3.7  | 24.9 $\pm$ 4.0  |
|                                 | G2/M       | 36.1 $\pm$ 2.3               | 18.2 $\pm$ 5.5  | 17.2 $\pm$ 5.2  | 10.4 $\pm$ 0.8  | 13.7 $\pm$ 2.3  | 13.7 $\pm$ 5.3  |

|                                                                                                                                                                    |            |           |           |           |           |           |          |
|--------------------------------------------------------------------------------------------------------------------------------------------------------------------|------------|-----------|-----------|-----------|-----------|-----------|----------|
|                                                                                                                                                                    | *Viability | 100.0±9.1 | 54.6±10.8 | 41.9±12.5 | 46.1±12.8 | 49.4±9.2  | 50.6±4.2 |
| <i>β</i> CD                                                                                                                                                        | Sub G0/G1  | 3.7±0.1   | 3.9±0.1   | 4.0±0.1   | 5.5±2.1   | 5.2±3.2   | 5.9±1.6  |
|                                                                                                                                                                    | G0/G1      | 47.4±2.1  | 53.8±2.2  | 53.9±10.3 | 60.6±2.5  | 59.5±7.2  | 59.9±9.2 |
|                                                                                                                                                                    | S          | 18.6±0.8  | 21.6±8.3  | 24.3±3.8  | 24.6±3.8  | 21.8±2.9  | 18.9±5.7 |
|                                                                                                                                                                    | G2/M       | 36.1±2.3  | 7.8±4.0   | 7.8±2.4   | 8.8±4.8   | 6.4±3.5   | 6.3±3.5  |
|                                                                                                                                                                    | *Viability | 100.0±9.1 | 77.3±10.4 | 54.0±3.7  | 59.2±8.0  | 37.0±28.2 | 70.3±4.2 |
| *% Cell viability values obtained from the assay reported in Section 2.2.1. have been included to facilitate their comparison with the % relative cell population. |            |           |           |           |           |           |          |

**Table S2.** Effect of  $\beta$ CDPEGs,  $\beta$ CD, and PEGs on the cell cycle of MDCK cells. Results are presented as mean values  $\pm$  SD of triplicate experiments.

| Compound       | Parameter  | Relative cell population (%) |            |           |          |           |           |
|----------------|------------|------------------------------|------------|-----------|----------|-----------|-----------|
|                |            | control                      | 25μg/mL    | 50μg/mL   | 100μg/mL | 250μg/mL  | 500μg/mL  |
| $\beta$ CDPEG2 | Sub G0/G1  | 4.1±0.5                      | 3.7±0.3    | 3.6±0.5   | 3.6±1.0  | 3.7±0.1   | 3.8±0.3   |
|                | G0/G1      | 44.6±6.4                     | 39.6±1.0   | 39.5±5.6  | 38.4±0.7 | 36.5±2.2  | 40.9±2.3  |
|                | S          | 13.0±5.4                     | 11.9±4.3   | 10.7±1.1  | 10.9±1.7 | 7.2±3.3   | 7.4±2.5   |
|                | G2/M       | 31.7±0.2                     | 28.9±1.8   | 30.8±1.8  | 27.7±1.0 | 29.1±5.2  | 30.5±3.2  |
|                | *Viability | 100.0±13.0                   | 100.0±11.7 | 100.0±7.2 | 94.8±8.1 | 100.0±2.5 | 100.0±7.7 |
| $\beta$ CDPEG5 | Sub G0/G1  | 4.1±0.5                      | 3.6±1.5    | 4.2±0.4   | 3.7±0.7  | 4.2±1.4   | 4.0±0.2   |
|                | G0/G1      | 44.6±6.4                     | 43.1±2.5   | 42.8±2.8  | 45.8±5.9 | 46.5±2.2  | 50.2±8.0  |
|                | S          | 13.0±5.4                     | 24.5±3.4   | 27.8±4.3  | 27.9±0.9 | 31.1±1.0  | 30.2±2.7  |
|                | G2/M       | 31.7±0.2                     | 11.9±4.3   | 10.7±1.1  | 10.9±1.7 | 7.2±3.3   | 7.4±2.5   |
|                | *Viability | 100.0±13.0                   | 91.8±8.8   | 83.9±1.9  | 82.9±4.5 | 70.8±5.7  | 72.1±2.2  |
| PEG2           | Sub G0/G1  | 4.1±0.5                      | 3.5±1.0    | 4.0±0.9   | 5.5±1.2  | 4.6±0.3   | 4.2±0.1   |
|                | G0/G1      | 44.6±6.4                     | 43.6±4.1   | 45.2±5.5  | 46.8±1.1 | 45.0±1.9  | 45.3±4.3  |
|                | S          | 13.0±5.4                     | 32.4±3.3   | 29.1±2.2  | 28.1±5.3 | 27.5±3.4  | 29.1±4.2  |
|                | G2/M       | 31.7±0.2                     | 11.6±0.8   | 13.5±1.1  | 11.2±0.8 | 11.6±1.1  | 9.7±1.0   |
|                | *Viability | 100.0±13.0                   | 78.9±3.5   | 69.2±6.8  | 64.3±2.3 | 58.6±20.3 | 74.0±3.9  |
| PEG5           | Sub G0/G1  | 4.1±0.5                      | 3.3±0.4    | 3.5±0.3   | 3.6±0.5  | 3.3±0.2   | 3.5±0.6   |
|                | G0/G1      | 44.6±6.4                     | 45.4±3.1   | 47.9±10.4 | 56.3±1.2 | 47.3±7.4  | 46.4±7.6  |
|                | S          | 13.0±5.4                     | 26.0±3.4   | 28.9±1.4  | 25.0±0.9 | 26.8±2.9  | 25.4±2.8  |
|                | G2/M       | 31.7±0.2                     | 13.1±2.3   | 11.5±1.7  | 11.7±0.6 | 11.6±1.1  | 16.7±3.4  |

|     |            |            |           |          |          |           |          |
|-----|------------|------------|-----------|----------|----------|-----------|----------|
|     | *Viability | 100.0±13.0 | 79.5±5.4  | 76.9±2.5 | 71.8±7.1 | 71.1±10.7 | 81.4±5.6 |
|     | Sub G0/G1  | 4.1±0.5    | 2.8±0.9   | 3.7±0.3  | 4.9±1.1  | 4.1±1.1   | 3.5±0.7  |
|     | G0/G1      | 44.6±6.4   | 42.0±8.9  | 36.0±7.4 | 41.8±3.7 | 41.8±3.2  | 45.1±5.0 |
| βCD | S          | 13.0±5.4   | 13.3±2.2  | 38.6±2.4 | 35.2±1.2 | 35.6±3.1  | 37.8±4.0 |
|     | G2/M       | 31.7±0.2   | 37.8±12.4 | 17.1±4.1 | 9.4±1.3  | 2.7±0.5   | 7.2±2.6  |
|     | *Viability | 100.0±13.0 | 95.1±5.8  | 97.6±9.4 | 73.7±6.4 | 79.0±2.7  | 76.1±2.8 |

---

\*% Cell viability values obtained from the assay reported in Section 2.3.1. have been included to facilitate their comparison with the % relative cell population.
